# Supplementary material for: First-principles descriptors of CO chemisorption on Ni and Cu surfaces
Source: Royal Society of Chemistry journal article supplement (doi:10.1039/c9cp00881k), 2019-01-01
Supplement: c9cp00881k1.pdf [file c9cp00881k1.pdf]

**First-principles descriptors of CO chemisorption on Ni and Cu surfaces**  
**Supporting Information**

Kareem M. Gameel, Icell M. Sharafeldin and Nageh K. Allam\*

**1. Copper Mulliken's Charge Transfer Tables:**

*Positive indicates electron gain and negative indicates electrons lost.*

| Cu | 100   |        |        | 110   |              |             |        | 111   |        |       |       |
|----|-------|--------|--------|-------|--------------|-------------|--------|-------|--------|-------|-------|
|    | Top   | Bridge | Hollow | Top   | Short Bridge | Long Bridge | Hollow | Top   | Bridge | FCC   | HCP   |
| s  | -0.29 | -0.28  | -0.32  | -0.14 | -0.16        | -0.22       | -0.36  | -0.23 | -0.29  | -0.32 | -0.33 |
| p  | 0.33  | 0.16   | 0.10   | 0.12  | 0.04         | -0.02       | 0.06   | 0.21  | 0.11   | 0.09  | 0.07  |
| d  | -0.15 | -0.18  | -0.22  | -0.09 | -0.18        | -0.11       | -0.14  | -0.09 | -0.12  | -0.14 | -0.11 |

**2. Nickel Mulliken's Charge Transfer Tables:**

*Positive indicates electron gain and negative indicates electrons lost.*

| Ni | 100   |        |        | 110   |              |             |        | 111   |        |       |       |
|----|-------|--------|--------|-------|--------------|-------------|--------|-------|--------|-------|-------|
|    | Top   | Bridge | Hollow | Top   | Short Bridge | Long Bridge | Hollow | Top   | Bridge | FCC   | HCP   |
| s  | -0.22 | -0.30  | -0.39  | -0.11 | -0.18        | -0.42       | -0.39  | -0.16 | -0.25  | -0.27 | -0.28 |
| p  | -0.02 | -0.21  | -0.30  | -0.05 | -0.18        | -0.20       | -0.13  | 0.06  | -0.08  | -0.12 | -0.14 |
| d  | 0.07  | 0.14   | 0.14   | -0.07 | -0.02        | 0.04        | 0.0    | -0.04 | -0.02  | 0.03  | -0.01 |
